# Supplementary material
Source: Springer Nature journal article supplement (https://www.springermedizin.de/resource/supplementary/13063_2014_2366_MOESM3_ESM.pdf/9621984)

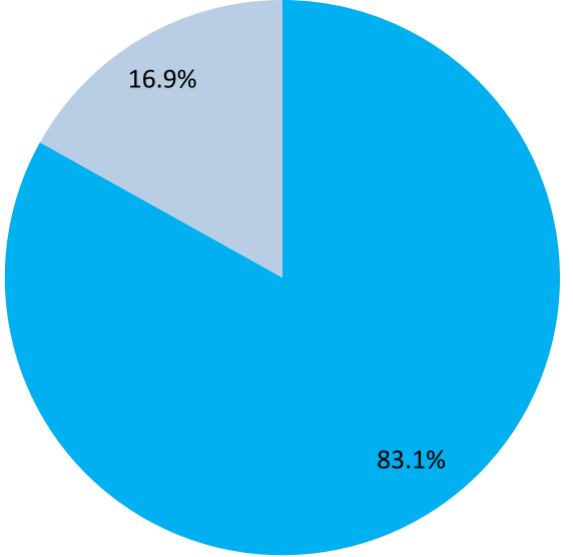

Infectious Diseases

Non-infectious Diseases

Supplement: MOESM3 [file 9621984]
